# Supplementary material
Source: ML conference proceedings conference paper supplement (https://openreview.net/forum?id=SVhG78Us5g5)
Supplement: supplementary_material [file attachment]

# Supplementary Material for “Byzantine-tolerant Distributed Multiclass Sparse Discriminant Analysis”

## Abstract

This document provides supplementary material to the article “Byzantine-tolerant Distributed Multiclass Sparse Discriminant Analysis” written by the same authors.

## 1 Proofs of Main Results

### 1.1 Proof of Theorem 3.1

**Theorem 1.1.** *Let  $\max_{2 \leq k \leq K} \|\widehat{\boldsymbol{\theta}}_k^{(0)} - \boldsymbol{\theta}_k^*\|_1 = O_{\mathbb{P}}(a_n)$  and choose some sufficiently large positive constant  $\eta_1$  such that*

$$\lambda_1 = \begin{cases} \eta_1 \left( \sqrt{\frac{\log p}{N}} + a_n \sqrt{\frac{\log p}{n}} \right), & \text{System I} \\ \eta_1 \left( \sqrt{\frac{\log p}{N}} + a_n \sqrt{\frac{\log p}{n}} + \frac{\alpha}{\sqrt{n}} + \frac{1}{n} \right), & \text{System II} \end{cases}$$

under conditions (C1), (C3) and (C5), we have

$$\max_{2 \leq k \leq K} \left\| \widehat{\boldsymbol{\theta}}_k^{(1)} - \boldsymbol{\theta}_k^* \right\|_2 = O_{\mathbb{P}}(\sqrt{s}\lambda_1), \quad (1.1)$$

and

$$\max_{2 \leq k \leq K} \left\| \widehat{\boldsymbol{\theta}}_k^{(1)} - \boldsymbol{\theta}_k^* \right\|_1 = O_{\mathbb{P}}(s\lambda_1). \quad (1.2)$$

Note that the initial error for the  $t$ -th iteration would be  $\max_{2 \leq k \leq K} \|\widehat{\boldsymbol{\theta}}_k^{(t-1)} - \boldsymbol{\theta}_k^*\|_1$  by plug-in the initial estimator  $\widehat{\boldsymbol{\theta}}_k^{(t-1)}$ . Then we can obtain the  $\ell_1$  and  $\ell_2$  error bound of the  $\widehat{\boldsymbol{\theta}}_k^{(t)}$  easily by induction according to (1.1) and (1.2) in Theorem 1.1. In the next, to show the proof of Theorem 1.1, we present several useful lemmas in the following.

**Lemma 1.1.** *For  $\mathbf{x}_k \in \mathbb{R}^p, k = 1, \dots, K-1$  such that*

$$\sum_{k=1}^{K-1} \|\mathbf{x}_k\|_1 \leq 4\sqrt{s(K-1)} \left( \sum_{k=1}^{K-1} \|\mathbf{x}_k\|_2^2 \right)^{1/2},$$

we have

$$\sum_{k=1}^{K-1} \mathbf{x}_k^T \widehat{\boldsymbol{\Sigma}}_{(0)} \mathbf{x}_k \geq L \sum_{k=1}^{K-1} \|\mathbf{x}_k\|_2^2,$$

holds with probability tending to 1.

**Lemma 1.2.** Let  $\|\widehat{\boldsymbol{\theta}}_k - \boldsymbol{\theta}_k^*\|_1 = O_{\mathbb{P}}(a_n)$ , then for  $k = 2, \dots, K$  we have

$$\left\| \widehat{\boldsymbol{\Sigma}}_{(0)} (\widehat{\boldsymbol{\theta}}_k^{(0)} - \boldsymbol{\theta}_k^*) - \widehat{\mathbf{b}}_{k,0} \right\|_{\infty} = O_{\mathbb{P}} \left( \sqrt{\frac{\log p}{N}} + a_n \sqrt{\frac{\log p}{n}} \right),$$

under System I.

**Lemma 1.3.** Let  $\|\widehat{\boldsymbol{\theta}}_k - \boldsymbol{\theta}_k^*\|_1 = O_{\mathbb{P}}(a_n)$ , then for  $k = 2, \dots, K$  we have

$$\left\| \widehat{\boldsymbol{\Sigma}}_{(0)} (\widehat{\boldsymbol{\theta}}_k^{(0)} - \boldsymbol{\theta}_k^*) - \widetilde{\mathbf{b}}_{k,0} \right\|_{\infty} = O_{\mathbb{P}} \left( \sqrt{\frac{\log p}{N}} + a_n \sqrt{\frac{\log p}{n}} + \frac{\alpha}{\sqrt{n}} + \frac{1}{n} \right),$$

under System II.

The proofs of above lemmas are relegated to Section 2 in the following.

*Proof of Theorem 3.1.* For simplicity of notations, we use  $\widehat{\boldsymbol{\theta}}_k$  to denote  $\widehat{\boldsymbol{\theta}}_k^{(1)}$ . By the optimality of  $(\widehat{\boldsymbol{\theta}}_2, \dots, \widehat{\boldsymbol{\theta}}_K)$ , we have

$$\begin{aligned} & \frac{1}{2} \widehat{\boldsymbol{\theta}}_k^T \widehat{\boldsymbol{\Sigma}}_{(0)} \widehat{\boldsymbol{\theta}}_k - \left( \widehat{\boldsymbol{\Sigma}}_{(0)} \widehat{\boldsymbol{\theta}}_k^{(0)} - \mathbf{b}_{k,0} \right)^T \widehat{\boldsymbol{\theta}}_k + \lambda_1 \sum_{j=1}^p \left( \sum_{l=2}^K \widehat{\boldsymbol{\theta}}_{l,j}^2 \right)^{1/2} \\ & \leq \frac{1}{2} \boldsymbol{\theta}_k^{*T} \widehat{\boldsymbol{\Sigma}}_{(0)} \boldsymbol{\theta}_k^* - \left( \widehat{\boldsymbol{\Sigma}}_{(0)} \widehat{\boldsymbol{\theta}}_k^{(0)} - \mathbf{b}_{k,0} \right)^T \boldsymbol{\theta}_k^* + \lambda_1 \sum_{j=1}^p \left( \sum_{l \neq k} \widehat{\boldsymbol{\theta}}_{l,j}^2 + (\boldsymbol{\theta}_{k,j}^*)^2 \right)^{1/2}. \end{aligned}$$

By rearranging the terms above, we have

$$\begin{aligned} & \frac{1}{2} (\widehat{\boldsymbol{\theta}}_k - \boldsymbol{\theta}_k^*)^T \widehat{\boldsymbol{\Sigma}}_{(0)} (\widehat{\boldsymbol{\theta}}_k - \boldsymbol{\theta}_k^*) \\ & \leq \left( \widehat{\boldsymbol{\Sigma}}_{(0)} (\widehat{\boldsymbol{\theta}}_k^{(0)} - \boldsymbol{\theta}_k^*) - \mathbf{b}_{k,0} \right)^T (\widehat{\boldsymbol{\theta}}_k - \boldsymbol{\theta}_k^*) + \lambda_1 \left\| \boldsymbol{\theta}_k^* - \widehat{\boldsymbol{\theta}}_k \right\|_1. \end{aligned} \tag{1.3}$$

According to Lemmas 1.2 and 1.3,

$$\left\| \widehat{\boldsymbol{\Sigma}}_{(0)} (\widehat{\boldsymbol{\theta}}_k^{(0)} - \boldsymbol{\theta}_k^*) - \mathbf{b}_{k,0} \right\|_{\infty} = \begin{cases} O_{\mathbb{P}} \left( \sqrt{\frac{\log p}{N}} + a_n \sqrt{\frac{\log p}{n}} \right), & \text{System I} \\ O_{\mathbb{P}} \left( \sqrt{\frac{\log p}{N}} + a_n \sqrt{\frac{\log p}{n}} + \frac{\alpha}{\sqrt{n}} + \frac{1}{n} \right). & \text{System II} \end{cases}$$

Thus  $\left\| \widehat{\boldsymbol{\Sigma}}_{(0)} \boldsymbol{\theta}_k^* - \mathbf{b}_{k,0} \right\|_{\infty} \leq \lambda_1/2$  holds with high probability for some sufficiently large positive constant  $\eta_1$  under both System I and II. Then (1.3) indicates that

$$\frac{1}{2} \sum_{k=2}^K (\widehat{\boldsymbol{\theta}}_k - \boldsymbol{\theta}_k^*)^T \widehat{\boldsymbol{\Sigma}}_{(0)} (\widehat{\boldsymbol{\theta}}_k - \boldsymbol{\theta}_k^*) \leq \frac{3\lambda_1}{2} \sum_{k=2}^K \left\| \boldsymbol{\theta}_k^* - \widehat{\boldsymbol{\theta}}_k \right\|_1. \tag{1.4}$$

By the optimality of  $(\widehat{\boldsymbol{\theta}}_2, \dots, \widehat{\boldsymbol{\theta}}_K)$ , we can also obtain that

$$\begin{aligned} & \frac{1}{2} \sum_{k=2}^K (\widehat{\boldsymbol{\theta}}_k - \boldsymbol{\theta}_k^*)^\top \widehat{\boldsymbol{\Sigma}}_{(0)} (\widehat{\boldsymbol{\theta}}_k - \boldsymbol{\theta}_k^*) + \lambda_1 \sum_{j=1}^p \|\widehat{\boldsymbol{\theta}}_{(j)}\|_2 \\ & \leq \sum_{k=2}^K \left( \widehat{\boldsymbol{\Sigma}}_{(0)} (\widehat{\boldsymbol{\theta}}_k^{(0)} - \boldsymbol{\theta}_k^*) - \mathbf{b}_{k,0} \right)^\top (\widehat{\boldsymbol{\theta}}_k - \boldsymbol{\theta}_k^*) + \lambda_1 \sum_{j=1}^p \|\boldsymbol{\theta}_{(j)}^*\|_2. \end{aligned} \quad (1.5)$$

Let  $\mathbf{c}_k = \widehat{\boldsymbol{\Sigma}}_{(0)} (\widehat{\boldsymbol{\theta}}_k^{(0)} - \boldsymbol{\theta}_k^*) - \mathbf{b}_{k,0}$  and  $\mathbf{c}_{(j)} = (\mathbf{c}_{2,j}, \dots, \mathbf{c}_{K,j})^\top$ , then it follows from (1.5) and  $\|\mathbf{c}_k\|_\infty \leq \lambda_1/2$  that

$$\begin{aligned} \lambda_1 \sum_{j=1}^p \|\widehat{\boldsymbol{\theta}}_{(j)}\|_2 & \leq \sum_{j=1}^p \mathbf{c}_{(j)}^\top (\widehat{\boldsymbol{\theta}}_{(j)} - \boldsymbol{\theta}_{(j)}^*) + \lambda_1 \sum_{j=1}^p \|\boldsymbol{\theta}_{(j)}^*\|_2 \\ & \leq \sum_{j=1}^p \|\mathbf{c}_{(j)}\|_2 \|\widehat{\boldsymbol{\theta}}_{(j)} - \boldsymbol{\theta}_{(j)}^*\|_2 + \lambda_1 \sum_{j=1}^p \|\boldsymbol{\theta}_{(j)}^*\|_2 \\ & \leq \max_j \|\mathbf{c}_{(j)}\|_2 \sum_{j=1}^p \|\widehat{\boldsymbol{\theta}}_{(j)} - \boldsymbol{\theta}_{(j)}^*\|_2 + \lambda_1 \sum_{j=1}^p \|\boldsymbol{\theta}_{(j)}^*\|_2 \\ & \leq \sqrt{K-1} \max_{2 \leq k \leq K} \|\mathbf{c}_k\|_\infty \sum_{j=1}^p \|\widehat{\boldsymbol{\theta}}_{(j)} - \boldsymbol{\theta}_{(j)}^*\|_2 + \lambda_1 \sum_{j=1}^p \|\boldsymbol{\theta}_{(j)}^*\|_2 \\ & \leq \frac{\lambda_1}{2} \sum_{j=1}^p \|\widehat{\boldsymbol{\theta}}_{(j)} - \boldsymbol{\theta}_{(j)}^*\|_2 + \lambda_1 \sum_{j=1}^p \|\boldsymbol{\theta}_{(j)}^*\|_2, \end{aligned}$$

which implies that  $\sum_{j \in S^c} \|\widehat{\boldsymbol{\theta}}_{(j)} - \boldsymbol{\theta}_{(j)}^*\|_2 \leq 3 \sum_{j \in S} \|\widehat{\boldsymbol{\theta}}_{(j)} - \boldsymbol{\theta}_{(j)}^*\|_2$ . In conjunction with the fact that

$$\left( \sum_{j \in S} \|\widehat{\boldsymbol{\theta}}_{(j)} - \boldsymbol{\theta}_{(j)}^*\|_2 \right)^2 \leq s \sum_{j \in S} \|\widehat{\boldsymbol{\theta}}_{(j)} - \boldsymbol{\theta}_{(j)}^*\|_2^2,$$

we have

$$\begin{aligned} \sum_{j \in S^c} \|\widehat{\boldsymbol{\theta}}_{(j)} - \boldsymbol{\theta}_{(j)}^*\|_1 & \leq \sqrt{K-1} \sum_{j \in S^c} \|\widehat{\boldsymbol{\theta}}_{(j)} - \boldsymbol{\theta}_{(j)}^*\|_2 \leq 3\sqrt{K-1} \sum_{j \in S} \|\widehat{\boldsymbol{\theta}}_{(j)} - \boldsymbol{\theta}_{(j)}^*\|_2 \\ & \leq 3\sqrt{s(K-1)} \left( \sum_{j \in S} \|\widehat{\boldsymbol{\theta}}_{(j)} - \boldsymbol{\theta}_{(j)}^*\|_2^2 \right)^{1/2} \\ & \leq 3\sqrt{s(K-1)} \left( \sum_{k=2}^K \|\widehat{\boldsymbol{\theta}}_{k,S}^{(1)} - \boldsymbol{\theta}_{k,S}^*\|_2^2 \right)^{1/2}. \end{aligned}$$

Similarly, we have  $\sum_{j \in S} \|\widehat{\boldsymbol{\theta}}_{(j)} - \boldsymbol{\theta}_{(j)}^*\|_1 \leq \sqrt{s(K-1)} (\sum_{k=2}^K \|\widehat{\boldsymbol{\theta}}_{k,S}^{(1)} - \boldsymbol{\theta}_{k,S}^*\|_2^2)^{1/2}$ . It implies that

$$\sum_{k=2}^K \left\| \boldsymbol{\theta}_k^* - \widehat{\boldsymbol{\theta}}_k \right\|_1 = \sum_{j=1}^p \|\widehat{\boldsymbol{\theta}}_{(j)} - \boldsymbol{\theta}_{(j)}^*\|_1 \leq 4\sqrt{s(K-1)} \left( \sum_{k=2}^K \|\widehat{\boldsymbol{\theta}}_k^{(1)} - \boldsymbol{\theta}_k^*\|_2^2 \right)^{1/2}. \quad (1.6)$$

By applying Lemma 1.1, we have

$$\frac{1}{2} \sum_{k=2}^K (\widehat{\boldsymbol{\theta}}_k - \boldsymbol{\theta}_k^*)^\top \widehat{\boldsymbol{\Sigma}}_{(0)} (\widehat{\boldsymbol{\theta}}_k - \boldsymbol{\theta}_k^*) \geq L \sum_{k=2}^K \left\| \boldsymbol{\theta}_k^* - \widehat{\boldsymbol{\theta}}_k \right\|_2^2. \quad (1.7)$$

Combining the inequalities (1.4), (1.6) and (1.7), we have

$$\left( \sum_{k=2}^K \left\| \boldsymbol{\theta}_k^* - \widehat{\boldsymbol{\theta}}_k \right\|_2^2 \right)^{1/2} \leq \frac{6\sqrt{s(K-1)}}{L} \lambda_1,$$

and

$$\sum_{k=2}^K \left\| \boldsymbol{\theta}_k^* - \widehat{\boldsymbol{\theta}}_k \right\|_1 \leq \frac{24s(K-1)}{L} \lambda_1.$$

It also indicates that

$$\max_{2 \leq k \leq K} \left\| \boldsymbol{\theta}_k^* - \widehat{\boldsymbol{\theta}}_k \right\|_2 = O_{\mathbb{P}}(\sqrt{s} \lambda_1),$$

and

$$\max_{2 \leq k \leq K} \left\| \boldsymbol{\theta}_k^* - \widehat{\boldsymbol{\theta}}_k \right\|_1 = O_{\mathbb{P}}(s \lambda_1).$$

□

## 1.2 Proof of Theorem 3.2

It suffices to prove Theorem 1.2 in the following.

**Theorem 1.2.** *Under conditions (C1)-(C5), with the same choice of  $\lambda_1$  as in Theorem 1.1, we have  $\widehat{S}^{(1)} \subseteq S$  holds with probability tending to 1 and  $\widehat{\boldsymbol{\theta}}_k^{(1)}$  satisfies that*

$$\left\| \widehat{\boldsymbol{\theta}}_k^{(1)} - \boldsymbol{\theta}_k^* \right\|_{\infty} = O_{\mathbb{P}} \left( \left\| \boldsymbol{\Sigma}_{SS}^{-1} \right\|_{\infty} \lambda_1 \right). \quad (1.8)$$

Moreover, suppose that there exists a sufficiently large constant  $C > 0$  such that

$$\theta_{\min}^* \geq C \left\| \boldsymbol{\Sigma}_{SS}^{-1} \right\|_{\infty} \lambda_1, \quad (1.9)$$

we have  $\widehat{S}^{(1)} = S$  with probability tending to 1.

**Lemma 1.4.** *By partitioning  $\boldsymbol{\Sigma}$  as*

$$\boldsymbol{\Sigma} = \begin{pmatrix} \boldsymbol{\Sigma}_{SS} & \boldsymbol{\Sigma}_{SS^c} \\ \boldsymbol{\Sigma}_{S^cS} & \boldsymbol{\Sigma}_{S^cS^c} \end{pmatrix},$$

and  $\boldsymbol{\mu}_k$  according to sets  $S$  and  $S^c$  for  $k = 2, \dots, K$  respectively, we have

$$\boldsymbol{\theta}_{k,S}^* = \boldsymbol{\Sigma}_{SS}^{-1} (\boldsymbol{\mu}_k - \boldsymbol{\mu}_1)_S, \quad (1.10)$$

and

$$(\boldsymbol{\mu}_k - \boldsymbol{\mu}_1)_{S^c} = \boldsymbol{\Sigma}_{S^cS} \boldsymbol{\Sigma}_{SS}^{-1} (\boldsymbol{\mu}_k - \boldsymbol{\mu}_1)_S. \quad (1.11)$$

*Proof of Theorem 1.2.* Here we only prove the results in System II and the proof for System I is similar. First we define the oracle sub-problem as

$$\widehat{\boldsymbol{\theta}}_S^o = \arg \min_{\boldsymbol{\theta}_k, S^c = \mathbf{0}} \sum_{k=2}^K \left\{ \frac{1}{2} \boldsymbol{\theta}_k^T \widehat{\boldsymbol{\Sigma}}_{(0)} \boldsymbol{\theta}_k - \widetilde{\mathbf{b}}_{k,g-1}^T \boldsymbol{\theta}_k \right\} + \lambda_1 \sum_{j \in S} \|\boldsymbol{\theta}_{(j)}\|_2. \quad (1.12)$$

Once we show  $\widehat{\boldsymbol{\theta}}_k^{(1)} = (\widehat{\boldsymbol{\theta}}_{k,S}^o, \mathbf{0})$  is the solution to (7), it is clear that  $\widehat{S}^{(1)} \subseteq S$ . According to the KKT condition, for any  $j \in S$ ,

$$\begin{pmatrix} \left( \widehat{\boldsymbol{\Sigma}}_{(0),SS} \widehat{\boldsymbol{\theta}}_{2,S}^o - (\widetilde{\mathbf{b}}_{2,0})_S \right)_j \\ \vdots \\ \left( \widehat{\boldsymbol{\Sigma}}_{(0),SS} \widehat{\boldsymbol{\theta}}_{K,S}^o - (\widetilde{\mathbf{b}}_{K,0})_S \right)_j \end{pmatrix} + \lambda_1 \mathbf{Z}_j = 0, \quad (1.13)$$

and for any  $j \notin S$ ,

$$\begin{pmatrix} \left( \widehat{\boldsymbol{\Sigma}}_{(0),S^cS} \widehat{\boldsymbol{\theta}}_{2,S}^o - (\widetilde{\mathbf{b}}_{2,0})_{S^c} \right)_j \\ \vdots \\ \left( \widehat{\boldsymbol{\Sigma}}_{(0),S^cS} \widehat{\boldsymbol{\theta}}_{K,S}^o - (\widetilde{\mathbf{b}}_{K,0})_{S^c} \right)_j \end{pmatrix} + \lambda_1 \mathbf{Z}_j = 0, \quad (1.14)$$

where  $\mathbf{Z}_j \in \mathbb{R}^{K-1}$  is subgradient of  $\|\boldsymbol{\theta}\|_2$  evaluated at  $\widehat{\boldsymbol{\theta}}_{(j)}$ . It suffices to show that

$$\lambda_1^{-1} \max_{j \in S^c} \left( \sum_{k=2}^K \left\{ \left( \widehat{\boldsymbol{\Sigma}}_{(0),S^cS} \widehat{\boldsymbol{\theta}}_{k,S}^o \right)_j - (\widetilde{\mathbf{b}}_{k,0})_j \right\}^2 \right)^{1/2} < 1, \quad (1.15)$$

holds with probability tending to 1. From equation (1.13), we have  $\widehat{\boldsymbol{\theta}}_{k,S}^o = \widehat{\boldsymbol{\Sigma}}_{(0),SS}^{-1} ((\widetilde{\mathbf{b}}_{k,0})_S - \lambda_1 \widetilde{\mathbf{Z}}_{k,S})$  where  $\widetilde{\mathbf{Z}}_{k,S} = (Z_{j,k} : j \in S) \in \mathbb{R}^S$  and  $\sum_{k=2}^K (Z_{j,k})^2 = 1$ . Note that

$$\begin{aligned} & \widehat{\boldsymbol{\Sigma}}_{(0),S^cS} \widehat{\boldsymbol{\theta}}_{k,S}^o - (\widetilde{\mathbf{b}}_{k,0})_{S^c} \\ &= \widehat{\boldsymbol{\Sigma}}_{(0),S^cS} \widehat{\boldsymbol{\Sigma}}_{(0),SS}^{-1} \left( (\widetilde{\mathbf{b}}_{k,0})_S - \lambda_1 \widetilde{\mathbf{Z}}_{k,S} \right) - (\widetilde{\mathbf{b}}_{k,0})_{S^c} \\ &= \widehat{\boldsymbol{\Sigma}}_{(0),S^cS} \widehat{\boldsymbol{\Sigma}}_{(0),SS}^{-1} \left\{ \left( \widehat{\boldsymbol{\Sigma}}_{(0),SS} - \boldsymbol{\Sigma}_{SS} \right) \left( \widehat{\boldsymbol{\theta}}_{k,S}^{(0)} - \boldsymbol{\theta}_{k,S}^* \right) + \boldsymbol{\Sigma}_{SS} \widehat{\boldsymbol{\theta}}_{k,S}^{(0)} - (\widetilde{\mathbf{d}}_{k,0})_S + (\widetilde{\boldsymbol{\mu}}_k - \widetilde{\boldsymbol{\mu}}_1)_S - \boldsymbol{\Sigma}_{SS} \boldsymbol{\theta}_{k,S}^* \right\} \\ & \quad - \left( \widehat{\boldsymbol{\Sigma}}_{(0),S^cS} - \boldsymbol{\Sigma}_{S^cS} \right) \left( \widehat{\boldsymbol{\theta}}_{k,S}^{(0)} - \boldsymbol{\theta}_{k,S}^* \right) - \boldsymbol{\Sigma}_{SS} \widehat{\boldsymbol{\theta}}_{k,S}^{(0)} + (\widetilde{\mathbf{d}}_{k,0})_{S^c} + \boldsymbol{\Sigma}_{S^cS} \boldsymbol{\theta}_{k,S}^* - (\widetilde{\boldsymbol{\mu}}_k - \widetilde{\boldsymbol{\mu}}_1)_{S^c} \\ & \quad - \lambda_1 \widehat{\boldsymbol{\Sigma}}_{(0),S^cS} \widehat{\boldsymbol{\Sigma}}_{(0),SS}^{-1} \widetilde{\mathbf{Z}}_{k,S}. \end{aligned}$$

We denote

$$I_1 = \widehat{\boldsymbol{\Sigma}}_{(0),S^cS} \widehat{\boldsymbol{\Sigma}}_{(0),SS}^{-1} \left\{ \left( \widehat{\boldsymbol{\Sigma}}_{(0),SS} - \boldsymbol{\Sigma}_{SS} \right) \left( \widehat{\boldsymbol{\theta}}_{k,S}^{(0)} - \boldsymbol{\theta}_{k,S}^* \right) + \boldsymbol{\Sigma}_{SS} \widehat{\boldsymbol{\theta}}_{k,S}^{(0)} - (\widetilde{\mathbf{d}}_{k,0})_S + (\widetilde{\boldsymbol{\mu}}_k - \widetilde{\boldsymbol{\mu}}_1)_S - \boldsymbol{\Sigma}_{SS} \boldsymbol{\theta}_{k,S}^* \right\},$$

and

$$I_2 = \left( \widehat{\boldsymbol{\Sigma}}_{(0),S^cS} - \boldsymbol{\Sigma}_{S^cS} \right) \left( \widehat{\boldsymbol{\theta}}_{k,S}^{(0)} - \boldsymbol{\theta}_{k,S}^* \right) + \boldsymbol{\Sigma}_{SS} \widehat{\boldsymbol{\theta}}_{k,S}^{(0)} - (\widetilde{\mathbf{d}}_{k,0})_{S^c} - \boldsymbol{\Sigma}_{S^cS} \boldsymbol{\theta}_{k,S}^* + (\widetilde{\boldsymbol{\mu}}_k - \widetilde{\boldsymbol{\mu}}_1)_{S^c}.$$

Observe that

$$\begin{aligned}\widehat{\Sigma}_{(0),S^cS}\widehat{\Sigma}_{(0),SS}^{-1} - \Sigma_{S^cS}\Sigma_{SS}^{-1} &= \left(\widehat{\Sigma}_{(0),S^cS} - \Sigma_{S^cS}\right) \left(\widehat{\Sigma}_{(0),SS}^{-1} - \Sigma_{SS}^{-1}\right) + \Sigma_{S^cS} \left(\widehat{\Sigma}_{(0),SS}^{-1} - \Sigma_{SS}^{-1}\right) \\ &\quad + \Sigma_{SS}^{-1} \left(\widehat{\Sigma}_{(0),S^cS} - \Sigma_{S^cS}\right),\end{aligned}$$

which implies

$$\begin{aligned}\left\|\widehat{\Sigma}_{(0),S^cS}\widehat{\Sigma}_{(0),SS}^{-1} - \Sigma_{S^cS}\Sigma_{SS}^{-1}\right\|_{\infty} &\leq \left\|\left(\widehat{\Sigma}_{(0),S^cS} - \Sigma_{S^cS}\right) \left(\widehat{\Sigma}_{(0),SS}^{-1} - \Sigma_{SS}^{-1}\right)\right\|_{\infty} \\ &\quad + \left\|\Sigma_{S^cS} \left(\widehat{\Sigma}_{(0),SS}^{-1} - \Sigma_{SS}^{-1}\right)\right\|_{\infty} + \left\|\Sigma_{SS}^{-1} \left(\widehat{\Sigma}_{(0),S^cS} - \Sigma_{S^cS}\right)\right\|_{\infty} \\ &\leq s^{3/2} \left|\widehat{\Sigma}_{(0),S^cS} - \Sigma_{S^cS}\right|_{\infty} \left\|\widehat{\Sigma}_{(0),SS}^{-1} - \Sigma_{SS}^{-1}\right\|_2 \\ &\quad + s^{3/2} \left|\Sigma_{S^cS}\right|_{\infty} \left\|\widehat{\Sigma}_{(0),SS}^{-1} - \Sigma_{SS}^{-1}\right\|_2 + s^{3/2} \left|\Sigma_{SS}^{-1}\right|_{\infty} \left\|\widehat{\Sigma}_{(0),S^cS} - \Sigma_{S^cS}\right\|_2.\end{aligned}$$

Using the inequalities (58a) and (58b) in [Wainwright \[2009\]](#), we have

$$\left\|\widehat{\Sigma}_{(0),SS}^{-1} - \Sigma_{SS}^{-1}\right\|_2 = O_{\mathbb{P}}\left(\sqrt{\frac{s}{n}}\right),$$

and

$$\left\|\widehat{\Sigma}_{(0),SS} - \Sigma_{SS}\right\|_2 = O_{\mathbb{P}}\left(\sqrt{\frac{s}{n}}\right).$$

Combining with the fact  $|\widehat{\Sigma}_{(0),S^cS} - \Sigma_{S^cS}|_{\infty} = O_{\mathbb{P}}(\sqrt{\log p/n})$ , it yields

$$\left\|\widehat{\Sigma}_{(0),S^cS}\widehat{\Sigma}_{(0),SS}^{-1} - \Sigma_{S^cS}\Sigma_{SS}^{-1}\right\|_{\infty} = O_{\mathbb{P}}\left(s^{3/2}\sqrt{\frac{\log p + s}{n}}\right).$$

Owing to the fact that  $\boldsymbol{\theta}_{k,S} = \Sigma_{SS}^{-1}(\boldsymbol{\mu}_k - \boldsymbol{\mu}_1)_S$  in [Lemma 1.4](#), we have

$$(\tilde{\boldsymbol{\mu}}_k - \tilde{\boldsymbol{\mu}}_1)_S - \Sigma_{SS}\boldsymbol{\theta}_{k,S}^* = (\tilde{\boldsymbol{\mu}}_k - \tilde{\boldsymbol{\mu}}_1)_S - (\boldsymbol{\mu}_k - \boldsymbol{\mu}_1)_S.$$

It yields that

$$\|(\tilde{\boldsymbol{\mu}}_k - \tilde{\boldsymbol{\mu}}_1)_S - \Sigma_{SS}\boldsymbol{\theta}_{k,S}^*\|_{\infty} = O_{\mathbb{P}}\left(\sqrt{\frac{\log p}{N}}\right).$$

Moreover, note that

$$\left\|\left(\widehat{\Sigma}_{(0),SS} - \Sigma_{SS}\right) \left(\widehat{\boldsymbol{\theta}}_{k,S}^{(0)} - \boldsymbol{\theta}_{k,S}^*\right)\right\|_{\infty} \leq \left|\widehat{\Sigma}_{(0),SS} - \Sigma_{SS}\right|_{\infty} \left\|\widehat{\boldsymbol{\theta}}_{k,S}^{(0)} - \boldsymbol{\theta}_{k,S}^*\right\|_1 = O_{\mathbb{P}}\left(\sqrt{\frac{\log p}{n}}a_n\right).$$

Then together with the assumption  $\|\Sigma_{S^cS}\Sigma_{SS}^{-1}\|_{\infty} \leq \xi$  and [Lemma 1.2](#) we have

$$\|I_1\|_{\infty} = O_{\mathbb{P}}\left(\sqrt{\frac{\log p}{N}} + \sqrt{\frac{\log p}{n}}a_n + \frac{\alpha}{\sqrt{n}} + \frac{1}{n}\right).$$

Similarly, we can show that

$$\|I_2\|_\infty = O_{\mathbb{P}} \left( \sqrt{\frac{\log p}{N}} + \sqrt{\frac{\log p}{n}} a_n + \frac{\alpha}{\sqrt{n}} + \frac{1}{n} \right).$$

Owing to the choice of  $\lambda_1$  in Theorem 1.1 and following the analysis above, there exists some positive constant  $C_1$  such that for  $k = 2, \dots, K$ ,

$$\begin{aligned} & \left\| \widehat{\boldsymbol{\theta}}_{k,S}^o - \boldsymbol{\theta}_{k,S}^* \right\|_\infty \\ & \leq \lambda_1 \left\| \widehat{\boldsymbol{\Sigma}}_{(0),SS}^{-1} \widetilde{\boldsymbol{Z}}_{k,S} \right\|_\infty + \left\| \widehat{\boldsymbol{\Sigma}}_{(0),SS}^{-1} \left( \widehat{\boldsymbol{\Sigma}}_{(0),SS} - \boldsymbol{\Sigma}_{SS} \right) \left( \widehat{\boldsymbol{\theta}}_{k,S}^{(0)} - \boldsymbol{\theta}_{k,S}^* \right) \right\|_\infty \\ & \quad + \left\| \widehat{\boldsymbol{\Sigma}}_{(0),SS}^{-1} \left( \boldsymbol{\Sigma}_{SS} \widehat{\boldsymbol{\theta}}_{k,S}^{(0)} - (\widetilde{\boldsymbol{d}}_{k,0})_S \right) \right\|_\infty + \left\| \widehat{\boldsymbol{\Sigma}}_{(0),SS}^{-1} \left( (\widetilde{\boldsymbol{\mu}}_k - \widetilde{\boldsymbol{\mu}}_1)_S - \boldsymbol{\Sigma}_{SS} \boldsymbol{\theta}_{k,S}^* \right) \right\|_\infty \\ & \leq C_1 \left\| \boldsymbol{\Sigma}_{SS}^{-1} \right\|_\infty \lambda_1, \end{aligned} \tag{1.16}$$

holds with probability tending to 1. Moreover, for  $j \in S^c$ , we have

$$\begin{aligned} \left| \left( \widehat{\boldsymbol{\Sigma}}_{(0),S^cS} \widehat{\boldsymbol{\Sigma}}_{(0),SS}^{-1} \widetilde{\boldsymbol{Z}}_{k,S} \right)_j \right| & \leq \left\| \widehat{\boldsymbol{\Sigma}}_{(0),S^cS} \widehat{\boldsymbol{\Sigma}}_{(0),SS}^{-1} - \boldsymbol{\Sigma}_{S^cS} \boldsymbol{\Sigma}_{SS}^{-1} \right\|_\infty \left\| \widetilde{\boldsymbol{Z}}_{k,S} \right\|_\infty \\ & \quad + \left\| \boldsymbol{\Sigma}_{S^cS} \boldsymbol{\Sigma}_{SS}^{-1} \right\|_\infty \left\| \widetilde{\boldsymbol{Z}}_{k,S} - \boldsymbol{Z}_{k,S}^* \right\|_\infty + \left| \left( \boldsymbol{\Sigma}_{S^cS} \boldsymbol{\Sigma}_{SS}^{-1} \boldsymbol{Z}_{k,S}^* \right)_j \right|, \end{aligned}$$

and

$$\begin{aligned} \left\| \widetilde{\boldsymbol{Z}}_{k,S} - \boldsymbol{Z}_{k,S}^* \right\|_\infty & = \max_{j \in S} \left| \frac{\widehat{\theta}_{kj}^o}{\|\boldsymbol{\theta}_{(j)}^o\|_2} - \frac{\theta_{kj}^*}{\|\boldsymbol{\theta}_{(j)}^*\|_2} \right| \\ & \leq \max_{j \in S} \frac{|\widehat{\theta}_{kj}^o - \theta_{kj}^*|}{\|\boldsymbol{\theta}_{(j)}^*\|_2} + \max_{j \in S} |\widehat{\theta}_{kj}^o| \frac{|\|\boldsymbol{\theta}_{(j)}^o\|_2 - \|\boldsymbol{\theta}_{(j)}^*\|_2|}{\|\boldsymbol{\theta}_{(j)}^o\|_2 \|\boldsymbol{\theta}_{(j)}^*\|_2} \\ & \leq \max_{j \in S} \frac{|\widehat{\theta}_{kj}^o - \theta_{kj}^*|}{\|\boldsymbol{\theta}_{(j)}^*\|_2} + \max_{j \in S} \frac{\|\boldsymbol{\theta}_{(j)}^o - \boldsymbol{\theta}_{(j)}^*\|_2}{\|\boldsymbol{\theta}_{(j)}^*\|_2} \\ & \lesssim 2 \max_{2 \leq k \leq K} \|\widehat{\boldsymbol{\theta}}_{k,S}^o - \boldsymbol{\theta}_{k,S}^*\|_\infty / \theta_{\min}^*. \end{aligned}$$

Combining with the Conditions (C2) and inequality (1.16), with probability tending to 1 we have

$$\begin{aligned} & \lambda_1^{-2} \max_{j \in S^c} \sum_{k=2}^K \left\{ \left( \widehat{\boldsymbol{\Sigma}}_{(0),S^cS} \widehat{\boldsymbol{\theta}}_{k,S}^o \right)_j - (\boldsymbol{b}_{k,g-1})_j \right\}^2 \leq \sum_{k=2}^K \left| \left( \widehat{\boldsymbol{\Sigma}}_{(0),S^cS} \widehat{\boldsymbol{\Sigma}}_{(0),SS}^{-1} \widetilde{\boldsymbol{Z}}_{k,S} \right)_j \right|^2 + o(1) \\ & \leq \max_{j \in S^c} \sum_{k=2}^K \left| \left( \boldsymbol{\Sigma}_{S^cS} \boldsymbol{\Sigma}_{SS}^{-1} \boldsymbol{Z}_{k,S}^* \right)_j \right|^2 + C_1^2 \left\| \boldsymbol{\Sigma}_{SS}^{-1} \right\|_\infty^2 \left\| \boldsymbol{\Sigma}_{S^cS} \boldsymbol{\Sigma}_{SS}^{-1} \right\|_\infty^2 (K-1) \lambda_1^2 / \theta_{\min}^{*2} + o(1) \\ & \leq 1 - \kappa + C_1^2 \left\| \boldsymbol{\Sigma}_{SS}^{-1} \right\|_\infty^2 \left\| \boldsymbol{\Sigma}_{S^cS} \boldsymbol{\Sigma}_{SS}^{-1} \right\|_\infty^2 (K-1) \lambda_1^2 / \theta_{\min}^{*2} + o(1) \\ & \leq 1 - \kappa/2, \end{aligned} \tag{1.17}$$

then we have shown the inequality (1.15) holds. Recall that with inequality (1.16), we have

$$\left\| \widehat{\boldsymbol{\theta}}_k^o - \boldsymbol{\theta}_k^* \right\|_\infty \leq C_1 \left\| \boldsymbol{\Sigma}_{SS}^{-1} \right\|_\infty \lambda_1,$$

holds with probability tending to 1. And note that  $\widehat{\boldsymbol{\theta}}_k^o$  is a solution to (7) with probability tending to 1, that is  $\mathbb{P}(\widehat{\boldsymbol{\theta}}_k^{(1)} = \widehat{\boldsymbol{\theta}}_k^o) \rightarrow 1$ . It yields

$$\left\| \widehat{\boldsymbol{\theta}}_k^{(1)} - \boldsymbol{\theta}_k^* \right\|_\infty \leq C_1 \left\| \boldsymbol{\Sigma}_{SS}^{-1} \right\|_\infty \lambda_1,$$

holds with probability tending to 1. If  $\theta_{\min}^* \geq C \left\| \boldsymbol{\Sigma}_{SS}^{-1} \right\|_\infty \lambda_1$  for some sufficiently large positive constant  $C$ , then  $\widehat{S}^{(1)} = S$  holds with probability tending to 1. In fact, the inequality (1.17) still holds if we choose sufficiently large  $C$ . Therefore, we have finished the proof of Theorem 1.2.  $\square$

## 2 Proof of Auxiliary Lemmas

### 2.1 Proof of Lemma 1.1

*Proof of Lemma 1.1.* With probability tending to 1, there exists some sufficiently large positive constant  $L$  such that

$$\begin{aligned} \sum_{k=1}^{K-1} \mathbf{x}_k^\top \widehat{\boldsymbol{\Sigma}}_{(0)} \mathbf{x}_k &\geq \sum_{k=1}^{K-1} \mathbf{x}_k^\top \boldsymbol{\Sigma} \mathbf{x}_k - \left| \widehat{\boldsymbol{\Sigma}}_{(0)} - \boldsymbol{\Sigma} \right|_\infty \sum_{k=1}^{K-1} \|\mathbf{x}_k\|_1^2 \\ &\geq \sum_{k=1}^{K-1} \mathbf{x}_k^\top \boldsymbol{\Sigma} \mathbf{x}_k - \left| \widehat{\boldsymbol{\Sigma}}_{(0)} - \boldsymbol{\Sigma} \right|_\infty \left( \sum_{k=1}^{K-1} \|\mathbf{x}_k\|_1 \right)^2 \\ &\geq \lambda_{\min}(\boldsymbol{\Sigma}) \sum_{k=1}^{K-1} \|\mathbf{x}_k\|_2^2 - 16s(K-1) \left| \widehat{\boldsymbol{\Sigma}}_{(0)} - \boldsymbol{\Sigma} \right|_\infty \sum_{k=1}^{K-1} \|\mathbf{x}_k\|_2^2 \\ &\geq L \sum_{k=1}^{K-1} \|\mathbf{x}_k\|_2^2, \end{aligned}$$

and the last inequality follows from the fact that  $\left| \widehat{\boldsymbol{\Sigma}}_{(0)} - \boldsymbol{\Sigma} \right|_\infty = O_{\mathbb{P}}(\sqrt{\log p/n})$  and  $s\sqrt{\log p/n} = o(1)$ .  $\square$

### 2.2 Proof of Lemma 1.2

First note that,

$$\widehat{\boldsymbol{\Sigma}}_{(0)} (\widehat{\boldsymbol{\theta}}_k^{(0)} - \boldsymbol{\theta}_k^*) - \widehat{\mathbf{b}}_{k,0} = \left( \widehat{\boldsymbol{\Sigma}}_{(0)} - \widehat{\boldsymbol{\Sigma}} \right) (\widehat{\boldsymbol{\theta}}_k^{(0)} - \boldsymbol{\theta}_k^*) - \widehat{\boldsymbol{\Sigma}} \boldsymbol{\theta}_k^* + (\widehat{\boldsymbol{\mu}}_k - \widehat{\boldsymbol{\mu}}_1).$$



Due to the definition of  $\widehat{\Sigma}$ , we have

$$\begin{aligned}\widehat{\Sigma}\theta_k^* - \Sigma\theta_k^* &= \frac{1}{N} \sum_{d=1}^K \sum_{\{i:Y_i=d\}} (\mathbf{X}_i - \widehat{\boldsymbol{\mu}}_d)(\mathbf{X}_i - \widehat{\boldsymbol{\mu}}_d)^\top \theta_k^* - \Sigma\theta_k^* \\ &= \frac{1}{N} \sum_{d=1}^K \sum_{\{i:Y_i=d\}} (\mathbf{X}_i - \boldsymbol{\mu}_d)(\mathbf{X}_i - \boldsymbol{\mu}_d)^\top \theta_k^* + \frac{1}{N} \sum_{d=1}^K N_d(\widehat{\boldsymbol{\mu}}_d - \boldsymbol{\mu}_d)(\widehat{\boldsymbol{\mu}}_d - \boldsymbol{\mu}_d)^\top \theta_k^* - \Sigma\theta_k^*.\end{aligned}$$

We note that  $\mathbf{X}_i^\top \theta_k^* \sim \mathcal{N}(\boldsymbol{\mu}_k^\top \theta_k^*, (\boldsymbol{\mu}_k - \boldsymbol{\mu}_1)^\top \Sigma^{-1}(\boldsymbol{\mu}_k - \boldsymbol{\mu}_1))$  for  $i$  such that  $Y_i = k$  and  $k \neq 1$ , which yields that  $|(\widehat{\boldsymbol{\mu}}_d - \boldsymbol{\mu}_d)^\top \theta_k^*| = O_{\mathbb{P}}(\Delta_{\max}/\sqrt{N})$ . Let  $\mathbf{D}_{di} = (\mathbf{X}_i - \boldsymbol{\mu}_d)(\mathbf{X}_i - \boldsymbol{\mu}_d)^\top \theta_k^* - \Sigma\theta_k^*$ , then  $\mathbf{D}_{di,j}$  is sub-exponential variable with parameter  $\sigma_{j,j}\Delta_k$ . According to Bernstein's inequality for sub-exponential variable [Vershynin, 2018], we have

$$\left\| \frac{1}{N} \sum_{d=1}^K \sum_{\{i:Y_i=d\}} \mathbf{D}_{di} \right\|_{\infty} = O_{\mathbb{P}} \left( \Delta_{\max} \sqrt{\frac{\log p}{N}} \right).$$

It follows that

$$\begin{aligned}\left\| \widehat{\Sigma}\theta_k^* - \Sigma\theta_k^* \right\|_{\infty} &\leq \left\| \frac{1}{N} \sum_{d=1}^K \sum_{\{i:Y_i=d\}} \mathbf{D}_{di} \right\|_{\infty} + \max_d \|(\widehat{\boldsymbol{\mu}}_d - \boldsymbol{\mu}_d)(\widehat{\boldsymbol{\mu}}_d - \boldsymbol{\mu}_d)^\top \theta_k^*\|_{\infty} \\ &\leq \left\| \frac{1}{N} \sum_{d=1}^K \sum_{\{i:Y_i=d\}} \mathbf{D}_{di} \right\|_{\infty} + \max_d \|(\widehat{\boldsymbol{\mu}}_d - \boldsymbol{\mu}_d)\|_{\infty} |(\widehat{\boldsymbol{\mu}}_d - \boldsymbol{\mu}_d)^\top \theta_k^*| \\ &\lesssim \Delta_{\max} \sqrt{\frac{\log p}{N}} + \sqrt{\frac{\log p}{N}} \frac{\Delta_{\max}}{\sqrt{N}}\end{aligned}$$

with high probability. It yields that

$$\begin{aligned}\left\| \widehat{\Sigma}_{(0)}(\widehat{\boldsymbol{\theta}}_k^{(0)} - \boldsymbol{\theta}_k^*) - \widehat{\mathbf{b}}_{k,0} \right\|_{\infty} &\leq \left| \widehat{\Sigma}_{(0)} - \widehat{\Sigma} \right|_{\infty} \left\| \boldsymbol{\theta}_k^* - \widehat{\boldsymbol{\theta}}_k^{(0)} \right\|_1 + \left\| \widehat{\Sigma}\boldsymbol{\theta}_k^* - (\widehat{\boldsymbol{\mu}}_k - \widehat{\boldsymbol{\mu}}_1) \right\|_{\infty} \\ &\leq \left| \widehat{\Sigma}_{(0)} - \Sigma \right|_{\infty} \left\| \boldsymbol{\theta}_k^* - \widehat{\boldsymbol{\theta}}_k^{(0)} \right\|_1 + \left| \widehat{\Sigma} - \Sigma \right|_{\infty} \left\| \boldsymbol{\theta}_k^* - \widehat{\boldsymbol{\theta}}_k^{(0)} \right\|_1 \\ &\quad + \left\| \widehat{\Sigma}\boldsymbol{\theta}_k^* - \Sigma\boldsymbol{\theta}_k^* \right\|_{\infty} + \|(\widehat{\boldsymbol{\mu}}_k - \widehat{\boldsymbol{\mu}}_1) - (\boldsymbol{\mu}_k - \boldsymbol{\mu}_1)\|_{\infty} \\ &\lesssim \sqrt{\frac{\log p}{n}} a_n + \sqrt{\frac{\log p}{N}} a_n + \Delta_{\max} \sqrt{\frac{\log p}{N}} + \sqrt{\frac{\log p}{N}} \\ &= O_{\mathbb{P}} \left( \sqrt{\frac{\log p}{n}} a_n + \sqrt{\frac{\log p}{N}} \right),\end{aligned}$$

where the third inequality follows from the basic bound  $\|\widehat{\boldsymbol{\mu}}_k - \widehat{\boldsymbol{\mu}}\|_{\infty} = O_{\mathbb{P}}(\sqrt{\log p/N})$ .

### 2.3 Proof of Lemma 1.3

**Lemma 2.1** (Berry-Esseen inequality [Petrov, 1975]). *Let  $X_1, \dots, X_n$  are i.i.d random variables and suppose*

$$\mathbb{E}X_1 = 0, \quad \mathbb{E}X_1^2 = \sigma^2 > 0, \quad \mathbb{E}|X_1|^3 < \infty, \quad \varrho = \frac{\mathbb{E}|X_1|^3}{\sigma^3}.$$

Then for some absolute positive constants  $A$

$$\sup_x \left| \mathbb{P} \left( \frac{1}{\sigma\sqrt{n}} \sum_{j=1}^n X_j < x \right) - \Phi(x) \right| \leq A \frac{\varrho}{\sqrt{n}}.$$

*Proof of Lemma 1.3.* Denote the Byzantine local machines by  $\mathcal{B}$  and  $|\mathcal{B}| = \alpha M$ . Let  $Y_l = \sqrt{n}(\tilde{\boldsymbol{\mu}}_1 - \boldsymbol{\mu}_1)_l / \sqrt{\sigma_{ll}}$  then

$$Y_l = \text{med} \{Y_{l,0}, Y_{l,1}, \dots, Y_{l,M}\}.$$

where  $Y_{l,m} = \sqrt{n}(\hat{\boldsymbol{\mu}}_1^{(m)} - \boldsymbol{\mu}_1)_l / \sqrt{\sigma_{ll}} \sim N(0, 1)$  if  $m \notin \mathcal{B}$ . Using the uniform bound and the fact that for any  $t \in \mathbb{R}$

$$\left| \frac{1}{M+1} \sum_{m=0}^M \mathbb{I}(Y_{l,m} \geq t) - \frac{1}{(1-\alpha)M+1} \sum_{m \notin \mathcal{B}} \mathbb{I}(Y_{l,m} \geq t) \right| \leq \alpha,$$

we have

$$\begin{aligned} & \mathbb{P} \left( \max_l \left| \frac{\sqrt{n}}{\sigma_{ll}} (\tilde{\boldsymbol{\mu}}_1 - \boldsymbol{\mu}_1)_l \right| \geq u_n \right) \\ & \leq p \max_l \mathbb{P} \left( \left| \frac{\sqrt{n}}{\sigma_{ll}} (\tilde{\boldsymbol{\mu}}_1 - \boldsymbol{\mu}_1)_l \right| \geq u_n \right) \\ & = p \max_l \mathbb{P} \left( \frac{1}{M+1} \sum_{m=0}^M \mathbb{I}(Y_{l,m} \geq u_n) \geq \frac{1}{2} \right) + p \max_l \mathbb{P} \left( \frac{1}{M+1} \sum_{m=0}^M \mathbb{I}(Y_{l,m} \leq -u_n) \leq \frac{1}{2} \right) \\ & = p \max_l \mathbb{P} \left( \frac{1}{(1-\alpha)M+1} \sum_{m \notin \mathcal{B}} \mathbb{I}(Y_{l,m} \geq u_n) - \mathbb{P}(Y_{l,m} \geq u_n) \geq \frac{1}{2} - \alpha - (1 - \Phi(u_n)) \right) \\ & + p \max_l \mathbb{P} \left( \frac{1}{(1-\alpha)M+1} \sum_{m \notin \mathcal{B}} \mathbb{I}(Y_{l,m} \leq -u_n) - \mathbb{P}(Y_{l,m} \leq -u_n) \leq \frac{1}{2} + \alpha - \Phi(-u_n) \right). \end{aligned}$$

By Taylor expansion we have

$$\Phi(u_n) = \Phi(0) + \phi(0)u_n + o(u_n).$$

Thus

$$\begin{aligned} & \mathbb{P} \left( \max_l \left| \frac{\sqrt{n}}{\sigma_{ll}} (\tilde{\boldsymbol{\mu}}_1 - \boldsymbol{\mu}_1)_l \right| \geq u_n \right) \\ & \leq p \max_l \mathbb{P} \left( \frac{1}{(1-\alpha)M+1} \sum_{m \notin \mathcal{B}} \mathbb{I}(Y_{l,m} \geq u_n) - \mathbb{P}(Y_{l,m} \geq u_n) \geq \phi(0)u_n + o(u_n) - \alpha \right) \\ & + p \max_l \mathbb{P} \left( \frac{1}{(1-\alpha)M+1} \sum_{m \notin \mathcal{B}} \mathbb{I}(Y_{l,m} \leq -u_n) - \mathbb{P}(Y_{l,m} \leq -u_n) \leq \phi(0)u_n + o(u_n) + \alpha \right). \end{aligned}$$

Let  $u_n = \rho'(\sqrt{\log p / ((1 - \alpha)M + 1)} + \alpha)$  for some sufficiently large positive constant  $\rho'$  and using Bernstein's inequality we have

$$\mathbb{P}\left(\max_l \frac{\sqrt{n}}{\sigma_{ll}} (\tilde{\boldsymbol{\mu}}_1 - \boldsymbol{\mu}_1)_l \geq u_n\right) \leq 2p^{-1}.$$

And this means that

$$\|\tilde{\boldsymbol{\mu}}_1 - \boldsymbol{\mu}_1\|_\infty \lesssim \sqrt{\frac{\log p}{N}} + \frac{\alpha}{\sqrt{n}},$$

holds with at least probability  $1 - 2p^{-1}$ . Similarly, we can prove

$$\|\tilde{\boldsymbol{\mu}}_k - \boldsymbol{\mu}_k\|_\infty \lesssim \sqrt{\frac{\log p}{N}} + \frac{\alpha}{\sqrt{n}},$$

holds with at least probability  $1 - 2p^{-1}$ . For the second inequality, note that

$$\left(\tilde{\boldsymbol{d}}_{k,0}\right)_l = \text{med} \left\{ \frac{1}{n} \sum_{d=1}^K \sum_{\{i \in \mathcal{H}_m : Y_i = d\}} (X_{il} - \hat{\mu}_{dl}^{(m)}) (\mathbf{X}_i - \hat{\boldsymbol{\mu}}_d^{(m)})^\top \hat{\boldsymbol{\theta}}_k^{(0)} : m = 1, 2, \dots, M \right\},$$

where  $X_{il}$  is the  $l$ -th entry of  $\mathbf{X}_i$ ,  $\hat{\mu}_{dl}^{(m)}$  is the  $l$ -th entry of  $\hat{\boldsymbol{\mu}}_d^{(m)}$ . By straightforward calculation we can write

$$\begin{aligned} & \frac{1}{n} \sum_{d=1}^K \sum_{\{i \in \mathcal{H}_m : Y_i = d\}} (X_{il} - \hat{\mu}_{dl}^{(m)}) (\mathbf{X}_i - \hat{\boldsymbol{\mu}}_d^{(m)})^\top \hat{\boldsymbol{\theta}}_k^{(0)} \\ &= \frac{1}{n} \sum_{d=1}^K \sum_{\{i \in \mathcal{H}_m : Y_i = d\}} (X_{il} - \mu_{dl}) (\mathbf{X}_i - \boldsymbol{\mu}_d)^\top \hat{\boldsymbol{\theta}}_k^{(0)} + \frac{1}{n} \sum_{d=1}^K n_k (\hat{\mu}_{dl}^{(m)} - \mu_{dl}) (\hat{\boldsymbol{\mu}}_d^{(m)} - \boldsymbol{\mu}_d)^\top \hat{\boldsymbol{\theta}}_k^{(0)}, \end{aligned}$$

and for  $m \notin \mathcal{B}$

$$(\mathbf{X}_i - \boldsymbol{\mu}_d)^\top \hat{\boldsymbol{\theta}}_k^{(0)} \sim \mathcal{N}\left(0, (\hat{\boldsymbol{\theta}}_k^{(0)})^\top \boldsymbol{\Sigma}(\hat{\boldsymbol{\theta}}_k^{(0)})\right), \quad i \in \mathcal{H}_m$$

where  $(\hat{\boldsymbol{\theta}}_k^{(0)})^\top \boldsymbol{\Sigma}(\hat{\boldsymbol{\theta}}_k^{(0)}) \lesssim \boldsymbol{\theta}_k^{*T} \boldsymbol{\Sigma} \boldsymbol{\theta}_k^* \leq \Delta_{\max}^2$ . Conditioning on  $\hat{\boldsymbol{\theta}}_k^{(0)}$ , we have

$$\mathbb{E}\left[(X_{il} - \mu_{dl}) (\mathbf{X}_i - \boldsymbol{\mu}_d)^\top \hat{\boldsymbol{\theta}}_k^{(0)} \middle| \hat{\boldsymbol{\theta}}_k^{(0)}\right] = \left(\boldsymbol{\Sigma} \hat{\boldsymbol{\theta}}_k^{(0)}\right)_l,$$

and

$$\begin{aligned} \tilde{\sigma}_l^2 &:= \text{Var} \left[ (X_{il} - \mu_{dl}) (\mathbf{X}_i - \boldsymbol{\mu}_d)^\top \hat{\boldsymbol{\theta}}_k^{(0)} \middle| \hat{\boldsymbol{\theta}}_k^{(0)} \right] \\ &\leq (\mathbb{E}(X_{il} - \mu_{dl})^4)^{1/2} \left( \mathbb{E} \left( (\mathbf{X}_i - \boldsymbol{\mu}_d)^\top \hat{\boldsymbol{\theta}}_k^{(0)} \right)^4 \right)^{1/2} \lesssim 3\sigma_{ll}^2 \Delta_k^2, \end{aligned}$$

for  $i \in \mathcal{H}_m$  and  $m \notin \mathcal{B}$  and  $\tilde{\sigma}_l^2 < \infty$  according to assumption. Let

$$W_{l,m} = \frac{1}{\sqrt{n}} \sum_{d=1}^K \sum_{\{i \in \mathcal{H}_m : Y_i = d\}} (X_{il} - \mu_{dl}) (\mathbf{X}_i - \boldsymbol{\mu}_d)^\top \hat{\boldsymbol{\theta}}_k^{(0)} - \left(\boldsymbol{\Sigma} \hat{\boldsymbol{\theta}}_k^{(0)}\right)_l,$$

and

$$V_{l,m} = \frac{1}{\sqrt{n}} \sum_{d=1}^K n_k (\hat{\mu}_{dl}^{(m)} - \mu_{dl}) (\hat{\boldsymbol{\mu}}_d^{(m)} - \boldsymbol{\mu}_d)^\top \hat{\boldsymbol{\theta}}_k^{(0)},$$

then for  $m \notin \mathcal{B}$

$$W_{l,m} \xrightarrow{d} N(0, \tilde{\sigma}_l^2) \text{ and } V_{l,m} = O_{\mathbb{P}}\left(\frac{\tilde{\sigma}_l}{\sqrt{n}}\right).$$

Denote

$$Z_{l,m} = \mathbb{I}(W_{l,m} + V_{l,m} \geq u_n) - \mathbb{P}(W_{l,m} + V_{l,m} \geq u_n),$$

and

$$Z_{l,m'} = \mathbb{I}(W_{l,m} + V_{l,m} \leq -u_n) - \mathbb{P}(W_{l,m} + V_{l,m} \leq -u_n).$$

Owing to the definition of sample median, we have

$$\begin{aligned} & \mathbb{P}\left(\max_l \sqrt{n} \left| \left( \tilde{\mathbf{d}}_{k,0} - \boldsymbol{\Sigma} \hat{\boldsymbol{\theta}}_k^{(0)} \right)_l \right| \geq u_n\right) \leq p \max_l \mathbb{P}\left(\sqrt{n} \left| \left( \tilde{\mathbf{d}}_{k,0} - \boldsymbol{\Sigma} \hat{\boldsymbol{\theta}}_k^{(0)} \right)_l \right| \geq u_n\right) \\ &= p \max_l \mathbb{P}\left(\frac{1}{(1-\alpha)M+1} \sum_{m \notin \mathcal{B}} Z_{l,m} \geq \frac{1}{2} - \alpha - \mathbb{P}(W_{l,m} + V_{l,m} \geq u_n)\right) \\ &+ p \max_l \mathbb{P}\left(\frac{1}{(1-\alpha)M+1} \sum_{m \notin \mathcal{B}} Z_{l,m'} \leq \frac{1}{2} + \alpha - \mathbb{P}(W_{l,m} + V_{l,m} \leq -u_n)\right). \end{aligned}$$

Using the fact  $\mathbb{P}(W_{l,m} + V_{l,m} \leq u_n) = \mathbb{P}(W_{l,m}/\tilde{\sigma}_l + V_{l,m}/\tilde{\sigma}_l \leq u_n/\theta_l)$  we have

$$\begin{aligned} & \left| \mathbb{P}\left(\frac{W_{l,m}}{\tilde{\sigma}_l} + \frac{V_{l,m}}{\tilde{\sigma}_l} \leq \frac{u_n}{\tilde{\sigma}_l}\right) - \Phi\left(\frac{u_n}{\tilde{\sigma}_l}\right) \right| \\ & \leq \left| \mathbb{P}\left(\frac{W_{l,m}}{\tilde{\sigma}_l} \leq \frac{u_n}{\tilde{\sigma}_l} - \frac{V_{l,m}}{\tilde{\sigma}_l}\right) - \Phi\left(\frac{u_n}{\tilde{\sigma}_l} - \frac{V_{l,m}}{\tilde{\sigma}_l}\right) \right| + \left| \Phi\left(\frac{u_n}{\tilde{\sigma}_l} - \frac{V_{l,m}}{\tilde{\sigma}_l}\right) - \Phi\left(\frac{u_n}{\tilde{\sigma}_l}\right) \right| \\ & \leq \sup_{x \in \mathbb{R}} \left| \mathbb{P}\left(\frac{W_{l,m}}{\tilde{\sigma}_l} \leq x\right) - \Phi(x) \right| + \left| \Phi\left(\frac{u_n}{\tilde{\sigma}_l} - \frac{V_{l,m}}{\tilde{\sigma}_l}\right) - \Phi\left(\frac{u_n}{\tilde{\sigma}_l}\right) \right| \\ & = \sup_{x \in \mathbb{R}} \left| \mathbb{P}\left(\frac{W_{l,m}}{\tilde{\sigma}_l} \leq x\right) - \Phi(x) \right| + \phi\left(\frac{u_n}{\tilde{\sigma}_l}\right) \frac{V_{l,m}}{\tilde{\sigma}_l} + o(V_{l,m}) \\ & \lesssim \frac{1}{\sqrt{n}} + \frac{1}{\sqrt{n}}, \end{aligned}$$

where the last inequality follows from Berry-Esseen inequality and the normal density function  $\phi(x)$  is bounded. It yields that

$$\begin{aligned} & \mathbb{P}\left(\max_l \sqrt{n} \left| \left( \tilde{\mathbf{d}}_{k,0} - \boldsymbol{\Sigma} \hat{\boldsymbol{\theta}}_k^{(0)} \right)_l \right| \geq u_n\right) \\ & \leq p \max_l \mathbb{P}\left(\frac{1}{(1-\alpha)M+1} \sum_{m \notin \mathcal{B}} Z_{l,m} \geq \phi(0)u_n/\tilde{\sigma}_l - \alpha + O\left(\frac{1}{\sqrt{n}}\right) + o(u_n)\right) \\ & + p \max_l \mathbb{P}\left(\frac{1}{(1-\alpha)M+1} \sum_{m \notin \mathcal{B}} Z_{l,m'} \leq \phi(0)u_n/\tilde{\sigma}_l + \alpha + O\left(\frac{1}{\sqrt{n}}\right) + o(u_n)\right). \end{aligned}$$

Let  $u_n'' = \rho''(\Delta_{\max}\sqrt{\log p/(M+1)} + 1/\sqrt{n} + \alpha)$  for some sufficiently large positive constant  $\rho''$ , then by Bernstein's inequality we can prove that

$$\left\| \tilde{\mathbf{d}}_{k,0} - \Sigma \hat{\boldsymbol{\theta}}_k^{(0)} \right\|_{\infty} = O_{\mathbb{P}} \left( \Delta_{\max} \sqrt{\frac{\log p}{N}} + \frac{\alpha}{\sqrt{n}} + \frac{1}{n} \right).$$

By the definition of  $\tilde{\mathbf{b}}_{k,0}$ , we have

$$\begin{aligned} & \left\| \widehat{\Sigma}_{(0)} (\hat{\boldsymbol{\theta}}_k^{(0)} - \boldsymbol{\theta}_k^*) - \tilde{\mathbf{b}}_{k,0} \right\|_{\infty} \\ &= \left\| \left( \widehat{\Sigma}_{(0)} - \Sigma \right) \left( \hat{\boldsymbol{\theta}}_k^{(0)} - \boldsymbol{\theta}_k^* \right) - \tilde{\mathbf{d}}_{k,0} + \Sigma \hat{\boldsymbol{\theta}}_k^{(0)} - \Sigma \boldsymbol{\theta}_k^* + (\tilde{\boldsymbol{\mu}}_k - \tilde{\boldsymbol{\mu}}_1) \right\|_{\infty} \\ &\leq \left\| \left( \widehat{\Sigma}_{(0)} - \Sigma \right) \left( \boldsymbol{\theta}_k^* - \hat{\boldsymbol{\theta}}_k^{(0)} \right) \right\|_{\infty} + \left\| \tilde{\mathbf{d}}_{k,0} - \Sigma \hat{\boldsymbol{\theta}}_k^{(0)} \right\|_{\infty} + \left\| \boldsymbol{\mu}_k - \boldsymbol{\mu}_1 - (\tilde{\boldsymbol{\mu}}_k - \tilde{\boldsymbol{\mu}}_1) \right\|_{\infty}, \end{aligned}$$

then the results follow.  $\square$

## 2.4 Proof of Lemma 1.4

*Proof of Lemma 1.4.* By the definition of the support set  $S$  and  $\Sigma \boldsymbol{\theta}_k^* = \boldsymbol{\mu}_k - \boldsymbol{\mu}_1$  we have

$$\begin{pmatrix} (\boldsymbol{\mu}_k - \boldsymbol{\mu}_1)_S \\ (\boldsymbol{\mu}_k - \boldsymbol{\mu}_1)_{S^c} \end{pmatrix} = \begin{pmatrix} \Sigma_{SS} & \Sigma_{SS^c} \\ \Sigma_{S^cS} & \Sigma_{S^cS^c} \end{pmatrix} \begin{pmatrix} \boldsymbol{\theta}_{k,S}^* \\ \mathbf{0} \end{pmatrix},$$

then the results follow immediately.  $\square$

## References

- V. V. Petrov. *Sums of Independent Random Variables*, volume 82. Springer, New York, 1975.
- R. Vershynin. *High-dimensional probability: An introduction with applications in data science*, volume 47. Cambridge university press, 2018.
- M. J. Wainwright. Sharp thresholds for high-dimensional and noisy sparsity recovery using  $\ell_1$ -constrained quadratic programming (lasso). *IEEE Transactions on Information Theory*, 55(5):2183–2202, 2009.
